# Supplementary material for: Targeting self-assembled F127-peptide polymer with pH sensitivity for release of anticancer drugs
Source: Royal Society of Chemistry journal article supplement (doi:10.1039/d0ra09898a), 2021-01-01
Supplement: d0ra09898a1.pdf [file d0ra09898a1.pdf]

## Appendix A. Supplementary data

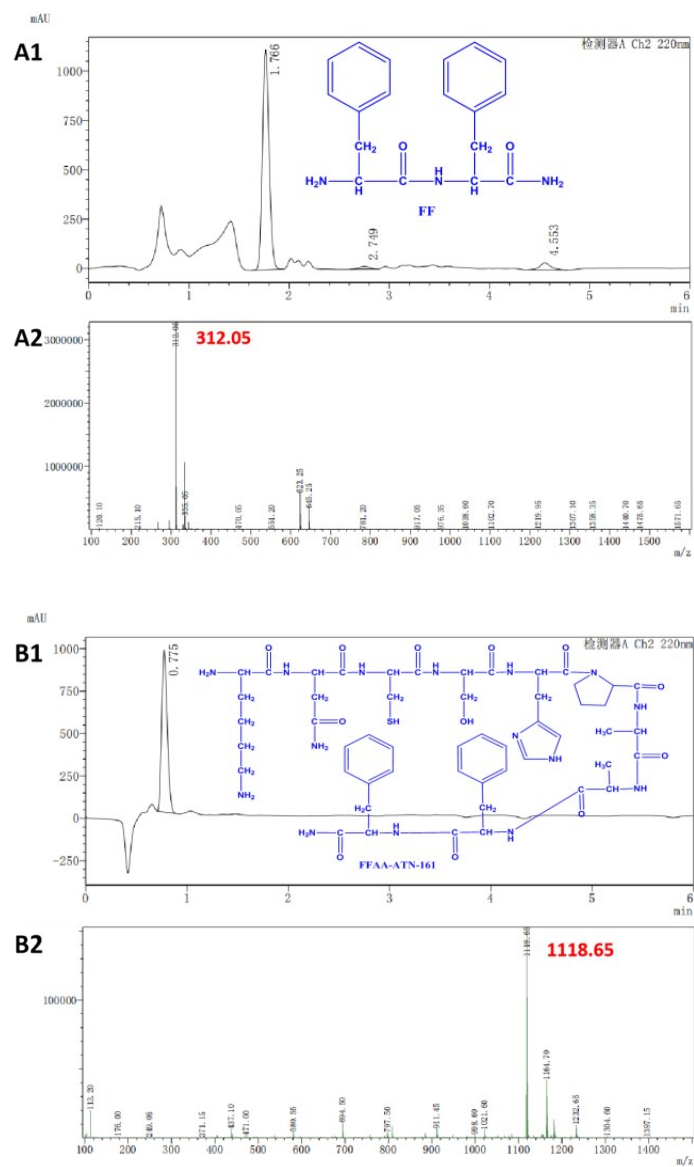

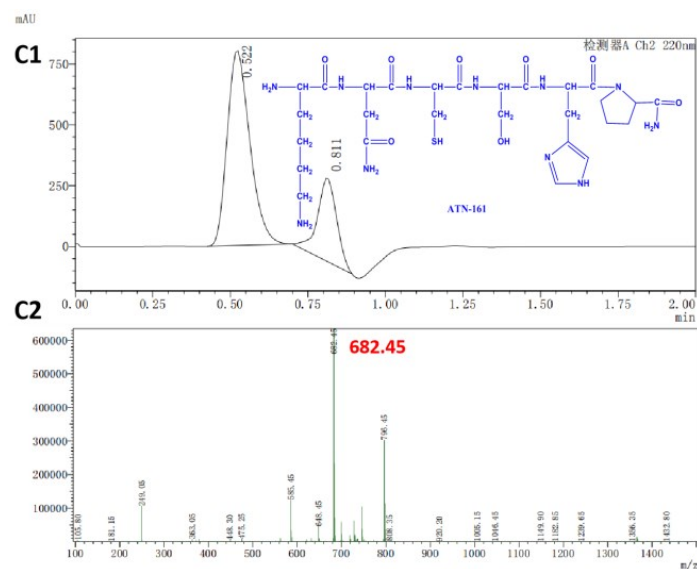

Figure S1. Liquid phase mass spectrum. (A1, A2) peptide sequence 1 (FF); (B1, B2) peptide sequence 2 (FF-ATN-161); (C1, C2) peptide sequence 3 (ATN-161).
